# Biological Impact of Transpulmonary Driving Pressure in Experimental Acute Respiratory Distress Syndrome

Cynthia S. Samary, Ph.D., Raquel S. Santos, M.Sc., Ph.D., Cíntia L. Santos, Ph.D.,  
Nathane S. Felix, M.S., Maira Bentes, R.T., Thiago Barboza, M.D., Vera L. Capelozzi, M.D., Ph.D.,  
Marcelo M. Morales, M.D., Ph.D., Cristiane S. N. B. Garcia, Ph.D., Sergio A. L. Souza, Ph.D.,  
John J. Marini, M.D., Marcelo Gama de Abreu, M.D., Ph.D., Pedro L. Silva, Ph.D.,  
Paolo Pelosi, M.D., F.E.R.S., Patricia R. M. Rocco, M.D., Ph.D.

## ABSTRACT

**Background:** Ventilator-induced lung injury has been attributed to the interaction of several factors: tidal volume ( $V_T$ ), positive end-expiratory pressure (PEEP), transpulmonary driving pressure (difference between transpulmonary pressure at end-inspiration and end-expiration,  $\Delta P_L$ ), and respiratory system plateau pressure ( $P_{plat,rs}$ ).

**Methods:** Forty-eight Wistar rats received *Escherichia coli* lipopolysaccharide intratracheally. After 24 h, animals were randomized into combinations of  $V_T$  and PEEP, yielding three different  $\Delta P_L$  levels:  $\Delta P_{L,LOW}$  ( $V_T = 6$  ml/kg, PEEP = 3 cm  $H_2O$ );  $\Delta P_{L,MEAN}$  ( $V_T = 13$  ml/kg, PEEP = 3 cm  $H_2O$  or  $V_T = 6$  ml/kg, PEEP = 9.5 cm  $H_2O$ ); and  $\Delta P_{L,HIGH}$  ( $V_T = 22$  ml/kg, PEEP = 3 cm  $H_2O$  or  $V_T = 6$  ml/kg, PEEP = 11 cm  $H_2O$ ). In other groups, at low  $V_T$ , PEEP was adjusted to obtain a  $P_{plat,rs}$  similar to that achieved with  $\Delta P_{L,MEAN}$  and  $\Delta P_{L,HIGH}$  at high  $V_T$ .

**Results:** At  $\Delta P_{L,LOW}$ , expressions of interleukin (IL)-6, receptor for advanced glycation end products (RAGE), and amphiregulin were reduced, despite morphometric evidence of alveolar collapse. At  $\Delta P_{L,HIGH}$  ( $V_T = 6$  ml/kg and PEEP = 11 cm  $H_2O$ ), lungs were fully open and IL-6 and RAGE were reduced compared with  $\Delta P_{L,MEAN}$  ( $27.4 \pm 12.9$  vs.  $41.6 \pm 14.1$  and  $0.6 \pm 0.2$  vs.  $1.4 \pm 0.3$ , respectively), despite increased hyperinflation and amphiregulin expression. At  $\Delta P_{L,MEAN}$  ( $V_T = 6$  ml/kg and PEEP = 9.5 cm  $H_2O$ ), when PEEP was not high enough to keep lungs open, IL-6, RAGE, and amphiregulin expression increased compared with  $\Delta P_{L,LOW}$  ( $41.6 \pm 14.1$  vs.  $9.0 \pm 9.8$ ,  $1.4 \pm 0.3$  vs.  $0.6 \pm 0.2$ , and  $6.7 \pm 0.8$  vs.  $2.2 \pm 1.0$ , respectively). At  $P_{plat,rs}$  similar to that achieved with  $\Delta P_{L,MEAN}$  and  $\Delta P_{L,HIGH}$ , higher  $V_T$  and lower PEEP reduced IL-6 and RAGE expression.

**Conclusion:** In the acute respiratory distress syndrome model used in this experiment, two strategies minimized ventilator-induced lung injury: (1) low  $V_T$  and PEEP, yielding low  $\Delta P_L$  and  $P_{plat,rs}$ ; and (2) low  $V_T$  associated with a PEEP level sufficient to keep the lungs open. (**ANESTHESIOLOGY** 2015; 123:423-33)

**A**CUTE respiratory distress syndrome (ARDS) is a severe inflammatory condition characterized by heterogeneous pulmonary injury with both normal and diseased areas throughout the lung.<sup>1</sup> Patients with ARDS require mechanical ventilation (MV), which improves gas exchange while minimizing harm to already injured tissue. The selection of adequate tidal volume ( $V_T$ ), positive end-expiratory pressure (PEEP), respiratory system plateau pressure ( $P_{plat,rs}$ ), and transpulmonary driving pressure ( $\Delta P_L$ ; difference between transpulmonary pressure at end-inspiration and at end-expiration) settings is crucial to reducing ventilator-induced lung injury (VILI).<sup>2-5</sup>

A lung-protective strategy ( $V_T \leq 6$  ml/kg predicted body weight and plateau pressures  $\leq 30$  cm  $H_2O$ ) and adequate levels of PEEP have been proposed to reduce VILI and mortality

## What We Already Know about This Topic

- Recent retrospective analysis of clinical acute respiratory distress syndrome trials suggested that driving pressure was an important factor associated with mortality.

## What This Article Tells Us That Is New

- Different combinations of tidal volume and positive end-expiratory pressure (PEEP) were used to create a range of driving pressures in a rat model of acute respiratory distress syndrome due to tracheal instillation of endotoxin for 24 h. Low transpulmonary driving pressure was associated with alveolar collapse and high driving pressure was associated with hyperinflation. The combination of a tidal volume of 6 ml/kg predicted body weight and the lowest PEEP and driving pressure to maintain oxygenation in a normal range minimized ventilator-induced lung injury even in the presence of alveolar collapse.

This article is featured in "This Month in Anesthesiology," page 1A. Supplemental Digital Content is available for this article. Direct URL citations appear in the printed text and are available in both the HTML and PDF versions of this article. Links to the digital files are provided in the HTML text of this article on the Journal's Web site ([www.anesthesiology.org](http://www.anesthesiology.org)).

Submitted for publication September 14, 2014. Accepted for publication March 20, 2015. From the Laboratory of Pulmonary Investigation, Carlos Chagas Filho Biophysics Institute, Federal University of Rio de Janeiro, Rio de Janeiro, Brazil (C.S.S., R.S.S., C.L.S., N.S.F., M.B., C.S.N.B.G., P.L.S., P.R.M.R.); Laboratory of Experimental Surgery, Faculty of Medicine, Federal University of Rio de Janeiro, Rio de Janeiro, Brazil (C.L.S.); Radiology Department, National Center of Structural Biology and Image, Federal University of Rio de Janeiro, Rio de Janeiro, Brazil (T.B., S.A.L.S.); Department of Pathology, School of Medicine, University of São Paulo, São Paulo, Brazil (V.L.C.); Laboratory of Cellular and Molecular Physiology, Carlos Chagas Filho Biophysics Institute, Federal University of Rio de Janeiro, Rio de Janeiro, Brazil (M.M.M.); Rio

Copyright © 2015, the American Society of Anesthesiologists, Inc. Wolters Kluwer Health, Inc. All Rights Reserved. Anesthesiology 2015; 123:423-33

in patients with ARDS.<sup>2</sup> Controversy remains regarding optimal PEEP, Pplat,rs, and driving pressures across the respiratory system and lungs. The use of lower  $V_T$  and lower PEEP may be associated with more homogeneous ventilation of aerated lung and maintenance of alveolar collapse, reducing inflation shear stress.<sup>3,4</sup> However, MV with lower  $V_T$  and higher PEEP may: (1) not be enough to keep the alveoli open at end-expiration, resulting in less atelectasis compared with lower PEEP but creating lung regions with alveolar instability and repeated opening and closing of lung units; (2) be able to open and keep open most of the collapsed alveoli, thus resulting in less recruitment and derecruitment, but potentially leading to hyperinflation of aerated lungs; and (3) increase Pplat,rs and  $\Delta P_L$ , predisposing to VILI. However, thus far, no study has compared the effects of combinations of different  $V_T$  and PEEP settings resulting in different fixed levels of  $\Delta P_L$  and Pplat,rs on lung morphology and biological markers of VILI in experimental ARDS.

We hypothesized in intratracheal endotoxin-induced ARDS that (1) low  $V_T$  associated with lower PEEP ( $\Delta P_{L,LOW}$ ) would minimize VILI because areas of alveolar collapse would remain unaltered, thus avoiding cyclic recruitment/derecruitment of distal lung units, whereas in normal lung regions, no hyperinflation would occur, thus reducing end-inspiratory stress and lung inflammation; (2) at the same level of  $\Delta P_L$ , low  $V_T$  combined with a level of PEEP not enough to open the lungs might result in VILI; and (3) the combination of low  $V_T$  with higher PEEP, when associated with higher Pplat,rs and  $\Delta P_L$ , would increase lung damage. For this purpose, we investigated the effects of different fixed levels of  $\Delta P_L$  or Pplat,rs induced by different combinations of  $V_T$  and PEEP on lung morphology and biological markers in experimental ARDS.

## Materials and Methods

This study was approved by the Federal University of Rio de Janeiro Health Science Center Research Ethics Committee (Rio de Janeiro, Brazil). All animals received humane care in compliance with the National Society for Medical Research "Principles of Laboratory Animal Care" and the U.S. National Academy of Sciences "Guide for the Care and Use of Laboratory Animals" (Washington, D.C.).

### Animal Preparation and Experimental Protocol

Forty-eight adult male Wistar rats (weight  $342 \pm 13$  g) were assigned to ARDS induction by intratracheal instillation

of *Escherichia coli* lipopolysaccharide [O55:B5] (200  $\mu$ g suspended in 20  $\mu$ l saline solution).<sup>6</sup> Twenty-four hours after ARDS induction, rats were anesthetized (ketamine 75 mg/kg and xylazine 2.5 mg/kg intraperitoneally) and tracheotomized. Six rats with ARDS were not mechanically ventilated (nonventilated group) and were used for molecular biology analysis. A polyethylene catheter (PE-50) was introduced into the carotid artery for blood sampling and monitoring of mean arterial pressure (MAP). Changes in esophageal pressure (Pes) were measured with a water-filled catheter (PE205) with side holes at the tip connected to a differential pressure transducer (UT-PL-400; SCIREQ, Canada). The catheter was passed into the stomach and slowly returned into the esophagus; proper positioning was assessed using the "occlusion test."<sup>7</sup> MAP was continuously recorded (LifeWindow 6000V Networked Multi-Parameter Veterinary Monitor; Digicare Animal Health, USA). The tail vein was punctured for continuous infusion of Ringer's lactate solution (10 ml  $\text{kg}^{-1} \text{h}^{-1}$ ). Gelafundin® (B. Braun, Germany) was administered (titrated in 0.5-ml increments) to keep MAP greater than 60 mmHg. Muscle paralysis was achieved by administration of pancuronium (0.4 mg intramuscularly). Animals were then mechanically ventilated (Servo-i; MAQUET, Sweden) in volume-controlled mode with  $V_T = 6$  ml/kg, minute ventilation = 160 ml/min, inspiratory-to-expiratory ratio = 1:2, fraction of inspired oxygen ( $F_{IO_2}$ ) = 1.0, and PEEP = 3 cm  $\text{H}_2\text{O}$  for 5 min. Arterial blood (300  $\mu$ l) was drawn into a heparinized syringe to determine arterial oxygen partial pressure ( $P_{aO_2}$ ), arterial carbon dioxide partial pressure ( $P_{aCO_2}$ ), and arterial pH (pHa) (ABL80 FLEX; Radiometer, Denmark) (BASELINE). After blood gas analysis,  $F_{IO_2}$  was reduced to 0.4 to prevent possible iatrogenic effects, and lung mechanics were assessed. Rats were then assigned to the following groups: (1) according to  $\Delta P_L$ : the first group was ventilated with  $V_T = 6$  ml/kg and PEEP = 3 cm  $\text{H}_2\text{O}$  ( $\Delta P_{L,LOW} = 7.5$  cm  $\text{H}_2\text{O}$ ); the second, with a  $V_T$  that generated sufficient  $\Delta P_L$  to keep animals alive during 1 h ( $\Delta P_{L,HIGH} = 12$  cm  $\text{H}_2\text{O}$ ,  $V_T = 22$  ml/kg, PEEP = 3 cm  $\text{H}_2\text{O}$ ); the third, with a  $V_T$  that generated a  $\Delta P_{L,MEAN} = (\Delta P_{L,LOW} + \Delta P_{L,HIGH})/2 = 10$  cm  $\text{H}_2\text{O}$  ( $V_T = 13$  ml/kg, PEEP = 3 cm  $\text{H}_2\text{O}$ ); the fourth, with a  $V_T = 6$  ml/kg and PEEP adjusted to reach the  $\Delta P_{L,HIGH}$  ( $V_T = 6$  ml/kg, PEEP = 11 cm  $\text{H}_2\text{O}$ ); and the fifth group was ventilated with a  $V_T = 6$  ml/kg and a PEEP adjusted to reach  $\Delta P_{L,MEAN}$  ( $V_T = 6$  ml/kg, PEEP = 9.5 cm  $\text{H}_2\text{O}$ ); and (2) according to Pplat,rs:  $V_T = 6$  ml/kg was applied and PEEP was adjusted to achieve Pplat,rs similar to that observed in the mean and high  $V_T$  groups (14 and 17 cm  $\text{H}_2\text{O}$ ), in which  $V_T$  was 13 and 22 ml/kg, respectively (fig. 1). After this step, animals were ventilated for 1 h, after which  $F_{IO_2}$  was set at 1.0 for 5 min, and arterial blood gases were analyzed (END). Animals were killed using sodium thiopental injection (60 mg/kg) and lungs were extracted for histological and molecular biology analysis.

de Janeiro Federal Institute of Education, Science and Technology, Rio de Janeiro, Brazil (C.S.N.B.G.); University of Minnesota, Minneapolis/Regions Hospital, Pulmonary and Critical Care Medicine, St. Paul, Minnesota (J.J.M.); Pulmonary Engineering Group, Department of Anesthesiology and Intensive Care Therapy, University Hospital Carl Gustav Carus, Technische Universität Dresden, Dresden, Germany (M.G.d.A.); and IRCCS AOU San Martino-IST, Department of Surgical Sciences and Integrated Diagnostics, University of Genoa, Genoa, Italy (P.P.).

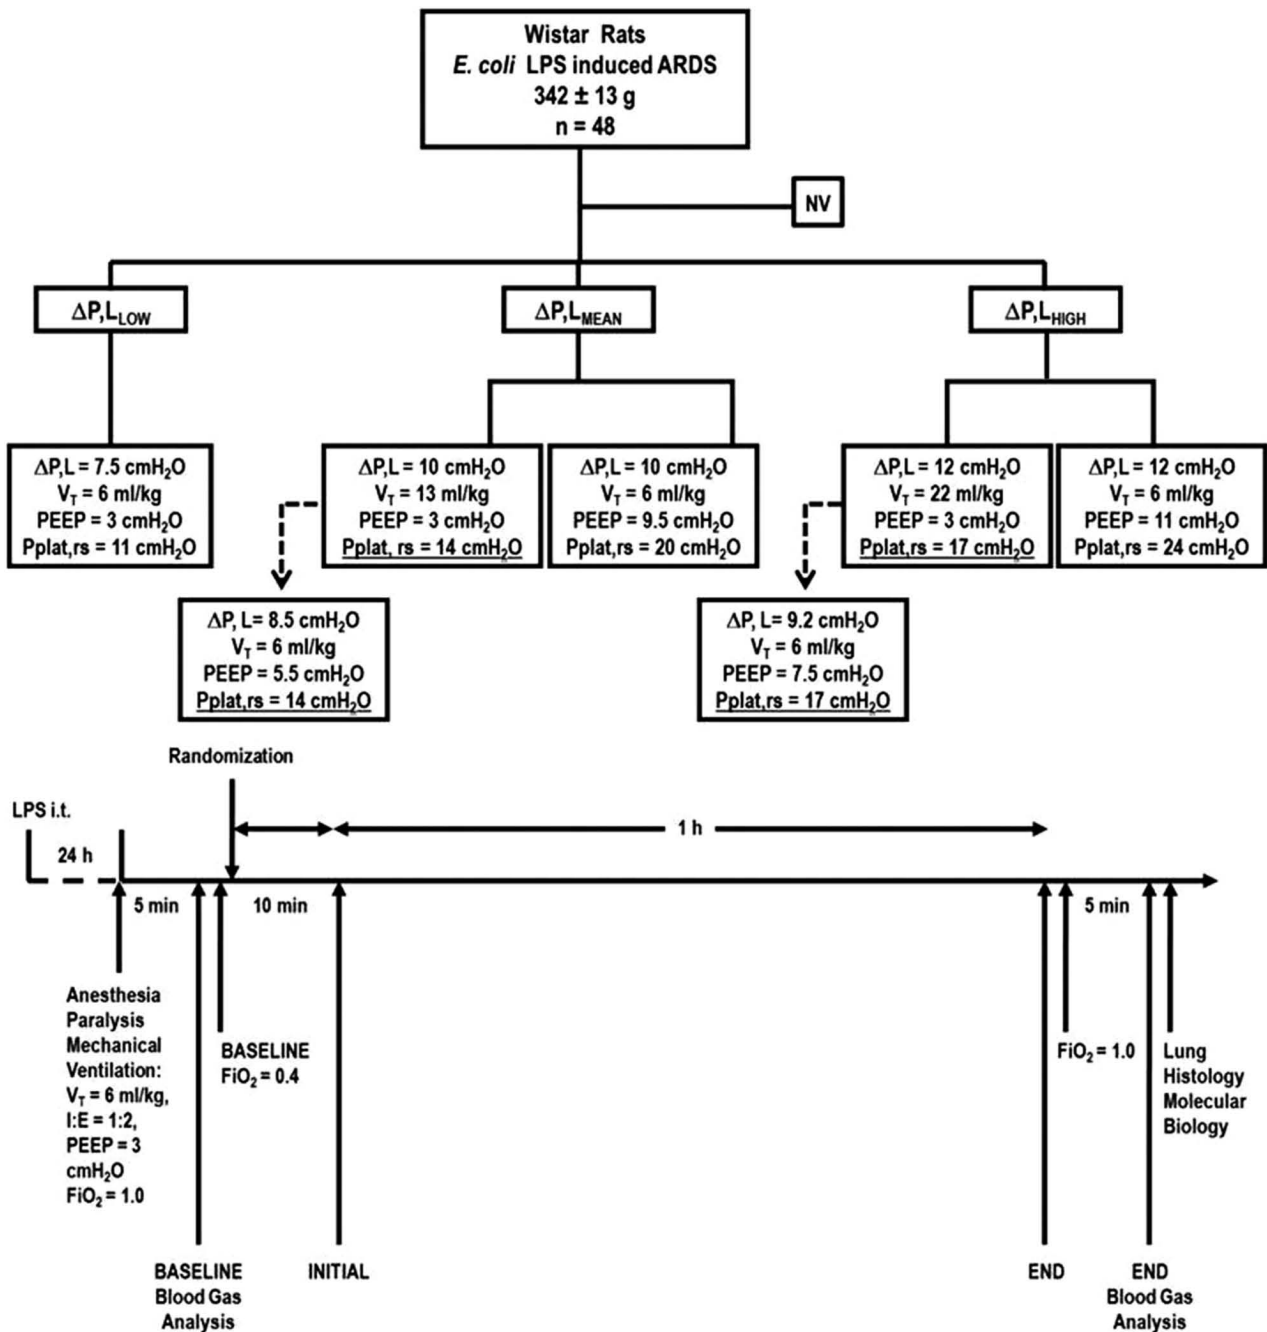

**Fig. 1.** Schematic flowchart of study design (top) and timeline of the procedure (bottom). Dashed lines represent additional groups in which tidal volume ( $V_T$ ) = 6 ml/kg was applied and positive end-expiratory pressure (PEEP) adjusted to similar respiratory system plateau pressure ( $P_{plat,rs}$ ) achieved when  $\Delta P_{L,MEAN}$  and  $\Delta P_{L,HIGH}$  were associated with high  $V_T$  (13 ml/kg [ $P_{plat,rs}$  = 14 cm H<sub>2</sub>O] and 22 ml/kg [ $P_{plat,rs}$  = 17 cm H<sub>2</sub>O]). ARDS = acute respiratory distress syndrome; FiO<sub>2</sub> = inspiratory fraction of oxygen; I:E = inspiratory-to-expiratory ratio; i.t. = intratracheally; LPS = *Escherichia coli* lipopolysaccharide; NV = nonventilated group; RR = respiratory rate;  $\Delta P_L$  = transpulmonary driving pressure.

### Data Acquisition and Processing

Airflow,  $V_T$ , and tracheal and esophageal pressures were measured.<sup>6,8</sup> Transpulmonary pressure was calculated as the difference between the pressure in the alveoli and the pressure in the pleural cavity and can be used to estimate lung stress (transpulmonary pressure at end-inspiration), whereas  $\Delta P_L$  was the difference between the transpulmonary pressure

during end-inspiration and end-expiration.<sup>6,9</sup> Respiratory system static elastance ( $Est,rs$ ) was calculated as the difference between  $P_{plat,rs}$  and PEEP divided by the  $V_T$ . Signals were filtered (200 Hz), amplified by a 4-channel conditioner (SC-24; SCIREQ), sampled at 200 Hz with a 12-bit analog-to-digital converter (NI-USB-6008; National Instruments, USA), and continuously recorded throughout the experiments.

### Light Microscopy

Laparotomy was performed immediately after blood sampling at END, and heparin (1,000 IU) was injected into the tail vein. The trachea was clamped at end-expiration. Lungs were removed *en bloc* with end-expiratory volume. The left lung was frozen in liquid nitrogen and submerged in Carnoy solution. Four-micrometer-thick slices were longitudinally cut from the left lung and stained with hematoxylin–eosin. Lung morphometric analysis was performed using an integrating eyepiece with a coherent system consisting of a grid with 100 points and 50 lines of known length coupled to a conventional light microscope (Olympus BX51; Olympus Latin America, Brazil). Both dorsal and ventral areas of the lungs were analyzed. The volume fractions of the lung occupied by collapsed alveoli, normal pulmonary areas, or hyperinflated structures (alveolar ducts, alveolar sacs, or alveoli; maximal chord length in air >120  $\mu\text{m}$ ) were determined by the point-counting technique at a magnification of  $\times 200$  across 10 random, noncoincident microscopic fields.<sup>10</sup>

### Transmission Electron Microscopy

Three slices ( $2 \times 2 \times 2$  mm) were cut from three different segments of the left lung and fixed for electron microscopy. On each lung electron microscopy image (20 fields per animal), damage to alveolar capillary membrane, type II epithelial and endothelial cells, and degree of interstitial edema were graded on a five-point, semiquantitative, severity-based scoring system as follows: 0 = normal lung parenchyma, 1 to 4 = changes in 1 to 25%, 26 to 50%, 51 to 75%, and 76 to 100% of examined tissue, respectively.<sup>6</sup> Lung morphometry and electron microscopy analysis were performed in a blinded manner (V.L.C. and N.S.F.).

### Expressions of Interleukin-6, Amphiregulin, Type 3 Procollagen, and Receptor for Advanced Glycation End Products

Quantitative real-time reverse-transcription polymerase chain reaction was performed to measure the expression of interleukin (IL)-6, type III procollagen (PCIII), receptor for advanced glycation end products (RAGE), and amphiregulin in lung tissue. Central slices of right lung were cut, collected in cryotubes, quick-frozen by immersion in liquid nitrogen, and stored at  $-80^\circ\text{C}$ . Total RNA was extracted from frozen tissues using SV total RNA Isolation System (Promega Corporation, USA) following the manufacturer's recommendations. RNA concentration was measured by spectrophotometry in a Nanodrop ND-1000 system (Thermo Fisher Scientific, USA). First-strand complementary DNA was synthesized from total RNA using the GoTaq® 2-STEP RT qPCR (reverse transcription-quantitative polymerase chain reaction) System (Promega Corporation). The primers used are shown in Supplemental Digital Content 1, <http://links.lww.com/ALN/B149>. Relative mRNA levels were measured with a SYBR green detection system using ABI 7500 real-time PCR (polymerase chain reaction) (Applied Biosystems, USA). Samples were measured

in triplicate. Relative gene expression was calculated as a ratio of the average gene expression levels compared with the reference gene (acidic ribosomal phosphoprotein P0 [36B4])<sup>11</sup> and expressed as fold change relative to nonventilated animals.

### Statistical Analysis

Each variable was tested for normality using the Kolmogorov–Smirnov test. Data are presented as mean  $\pm$  SD unless otherwise specified. Comparisons among ventilatory parameters, lung functional data and morphometry, and molecular biology data were performed using one-way ANOVA with Bonferroni *post hoc* test among groups with the same  $V_T$ . A *t* test with Bonferroni correction was used to compare groups with the same  $\Delta P_L$ . Comparisons among results of semiquantitative analysis of electron microscopy were performed by one-way ANOVA on ranks with Bonferroni *post hoc* test. Pearson correlations of  $\Delta P_L$ , Pplat,rs, alveolar hyperinflation and collapse, and expression of biological markers were calculated. Multiple linear regression analysis was done between independent ( $\Delta P_L$ , Pplat,rs,  $V_T$ , and PEEP) and dependent (IL-6, RAGE, amphiregulin, PCIII, alveolar collapse, and hyperinflation) variables. Sample size calculation was based on pilot studies and our past experience with the ventilator strategies in small animals.<sup>8</sup> All tests were performed in GraphPad Prism v5.00 (GraphPad Software, USA). Significance was established at *P* value less than 0.05. All ventilatory variables associated with  $\Delta P_L$  and Pplat,rs (*i.e.*,  $V_T$  and PEEP) were shown because these parameters exhibit collinearity at different levels.

### Results

The survival rate was 100% in all groups during the investigation. Forty-eight animals were used, with 6 animals allocated to each group, including the nonventilated group.

Ventilatory parameters, Est,rs, and arterial blood gases at BASELINE (PEEP = 3 cm  $\text{H}_2\text{O}$ ) (see table 1, Supplemental Digital Content 2, <http://links.lww.com/ALN/B150>) showed similar functional impairment among groups before modification of ventilator settings, suggesting a similar degree of lung damage.  $\Delta P_L$ , Est,rs,  $V_T$ , PEEP, Pplat,rs, and respiratory rate did not differ from INITIAL to END in any group. MAP remained greater than 60 mmHg throughout the experiments (see table 2, Supplemental Digital Content 2, <http://links.lww.com/ALN/B150>).

Arterial blood gases at END with different ventilator settings are shown in table 1. At similar fixed levels of  $\Delta P_L$  and Pplat,rs, oxygenation did not differ with changes in  $V_T$  and PEEP. At low  $V_T$ , higher PEEP led to a progressive improvement in oxygenation.  $\text{PaCO}_2$  markedly increased with  $V_T = 6$  ml/kg and PEEP = 11 cm  $\text{H}_2\text{O}$  compared with  $V_T = 6$  ml/kg and PEEP = 5.5 cm  $\text{H}_2\text{O}$  and declined with  $V_T = 22$  ml/kg and PEEP = 3 cm  $\text{H}_2\text{O}$  compared with  $V_T = 6$  ml/kg and PEEP = 11 cm  $\text{H}_2\text{O}$ .

The highest degree of alveolar collapse was observed at  $\Delta P_{L_{\text{LOW}}}$ , and the most hyperinflation at  $\Delta P_{L_{\text{HIGH}}}$  (fig. 2).



**Table 1.** Arterial Blood Gases at END

|                                         | NV          | $\Delta P_{L,LOW}$ |             | $\Delta P_{L,MEAN}$ |               | $\Delta P_{L,HIGH}$ |             |
|-----------------------------------------|-------------|--------------------|-------------|---------------------|---------------|---------------------|-------------|
| $\Delta P_{L,rs}$ (cm H <sub>2</sub> O) | —           | 7.5                | 8.5         | 10                  | 10            | 9.2                 | 12          |
| $V_T$ (ml/kg)                           | —           | 6                  | 6           | 13                  | 6             | 6                   | 22          |
| PEEP (cm H <sub>2</sub> O)              | —           | 3                  | 5.5         | 3                   | 9.5           | 7.5                 | 3           |
| Pplat,rs (cm H <sub>2</sub> O)          | —           | 11                 | 14          | 14                  | 20            | 17                  | 17          |
| pHa                                     | 7.27 ± 0.06 | 7.30 ± 0.50        | 7.30 ± 0.01 | 7.39 ± 0.10         | 7.21 ± 0.10*† | 7.30 ± 0.10‡        | 7.47 ± 0.10 |
| Paco <sub>2</sub> (mmHg)                | 50 ± 9.9    | 59 ± 8             | 44 ± 8      | 47 ± 9              | 71 ± 16*      | 44 ± 9‡             | 34 ± 5      |
| Pao <sub>2</sub> (mmHg)                 | 142 ± 59.8  | 302 ± 83           | 368 ± 110   | 468 ± 84            | 511 ± 44      | 385 ± 126           | 498 ± 79    |
|                                         |             |                    |             |                     |               |                     | 543 ± 16*   |

Values are expressed as mean ± SD of six animals per group. One-way ANOVA followed by Bonferroni *post hoc* test. Dashed lines represent Pplat,rs similar to  $\Delta P_{L,MEAN}$  and  $\Delta P_{L,HIGH}$  at high  $V_T$  (13 ml/kg [Pplat,rs = 14 cm H<sub>2</sub>O] and 22 ml/kg [Pplat,rs = 17 cm H<sub>2</sub>O]). For this purpose,  $V_T$  was kept low (6 ml/kg) and PEEP was adjusted for the level of Pplat,rs. Gas exchange was evaluated at  $FiO_2 = 1.0$ .

\* vs.  $V_T$ 6-PEEP5.5; † vs.  $V_T$ 13-PEEP3; ‡ vs.  $V_T$ 6-PEEP9.5; § vs.  $V_T$ 22-PEEP3; || vs.  $V_T$ 6-PEEP3.

NV = nonventilated group; Paco<sub>2</sub> = arterial carbon dioxide partial pressure; Pao<sub>2</sub> = arterial oxygen partial pressure; PEEP = positive end-expiratory pressure; pHa = arterial pH; Pplat,rs = respiratory system plateau pressure;  $V_T$  = tidal volume;  $\Delta P_{L,rs}$  = transpulmonary driving pressure.

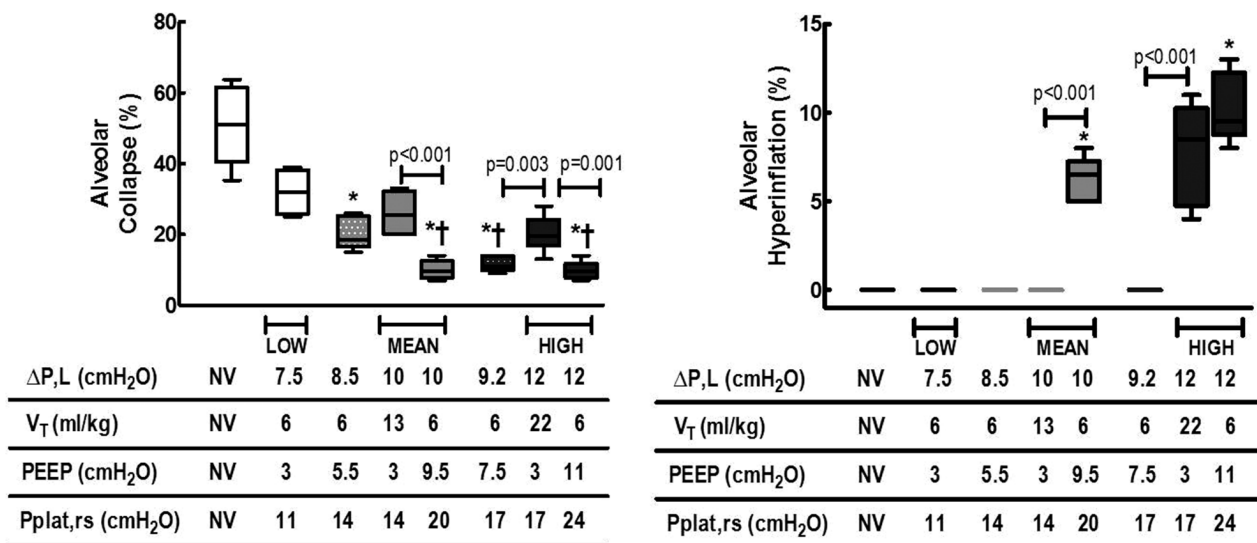

**Fig. 2.** Lung morphometry. Box plot of the fractional area of alveolar collapse and hyperinflation. All values were computed in 10 random, noncoincident fields of view per rat. Boxes show the interquartile (25 to 75%) range, whiskers encompass the range (minimum–maximum), and horizontal lines represent median values of six animals per group. Student *t* test followed by Bonferroni correction was performed between groups with similar fixed levels of  $\Delta P_{L,rs}$  and Pplat,rs. One-way ANOVA followed by Bonferroni *post hoc* test was used among the groups with similar  $V_T$ . \* Versus  $V_T$ 6-PEEP3; † versus  $V_T$ 6-PEEP5.5 ( $P < 0.05$ ). NV = nonventilated group; PEEP = positive end-expiratory pressure; Pplat,rs = respiratory system plateau pressure;  $V_T$  = tidal volume;  $\Delta P_{L,rs}$  = transpulmonary driving pressure.

At  $\Delta P_{L,MEAN}$ , alveolar collapse was lower with  $V_T = 6$  ml/kg and PEEP = 9.5 cm H<sub>2</sub>O compared with  $V_T = 13$  ml/kg and PEEP = 3 cm H<sub>2</sub>O; however, hyperinflation was present with the former strategy. At  $\Delta P_{L,HIGH}$ , the extent of alveolar collapse was lower with  $V_T = 6$  ml/kg and PEEP = 11 cm H<sub>2</sub>O than with  $V_T = 22$  ml/kg and PEEP = 3 cm H<sub>2</sub>O, but both strategies produced hyperinflation. At Pplat,rs = 17 cm H<sub>2</sub>O, ventilation with  $V_T = 6$  ml/kg and PEEP = 7.5 cm H<sub>2</sub>O was associated with less alveolar collapse and hyperinflation compared with  $V_T = 22$  ml/kg and PEEP = 3 cm H<sub>2</sub>O. For  $V_T = 6$  ml/kg, the increase in PEEP levels reduced alveolar collapse while increasing hyperinflation.

All animals showed cytoplasmic degeneration of type I and II epithelial and endothelial cells as well as alveolar-capillary damage. At similar levels of  $\Delta P_{L,rs}$  and Pplat,rs,

regardless of  $V_T$  and PEEP, no significant differences were observed in damage to the alveolar-capillary membrane, type I and II epithelial cells, or degree of interstitial edema. At  $V_T = 6$  ml/kg, ventilation with the highest PEEP to open the lung (PEEP = 11 cm H<sub>2</sub>O) led to less injury to the alveolar capillary membrane and type I and II epithelial cells compared with PEEP = 7.5 cm H<sub>2</sub>O and PEEP = 9.5 cm H<sub>2</sub>O, and less interstitial edema than PEEP = 9.5 cm H<sub>2</sub>O (see table 3, Supplemental Digital Content 2, <http://links.lww.com/ALN/B150>, and fig. 1, Supplemental Digital Content 3, <http://links.lww.com/ALN/B151>).

Gene expression of biological markers associated with inflammation (IL-6), damage inflicted to type I epithelial cells (RAGE), pulmonary stretch (amphiregulin), and fibrogenesis (PCIII) is shown in figure 3. IL-6, RAGE,

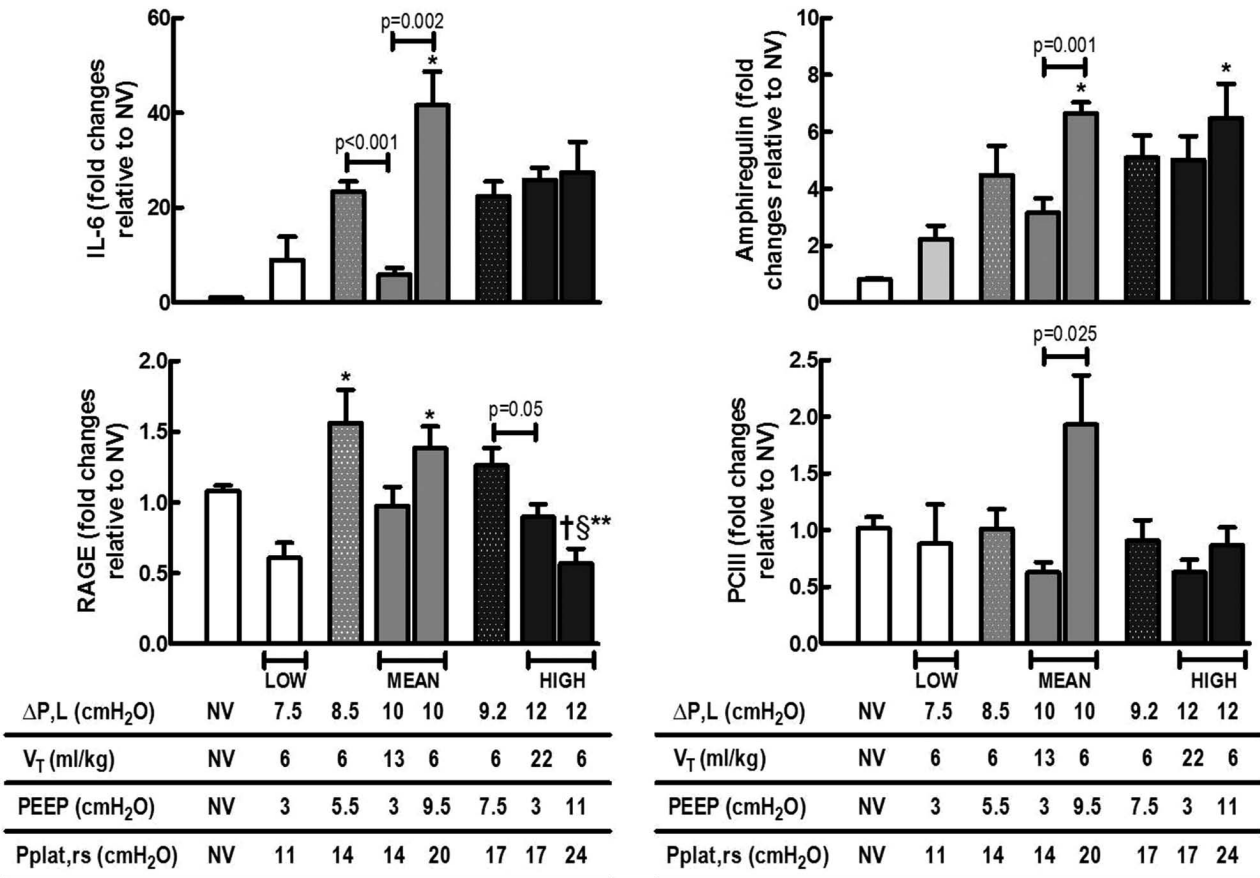

**Fig. 3.** Expression of biological markers. Real-time polymerase chain reaction analysis of biological markers associated with inflammation (interleukin [IL]-6), alveolar overdistension (amphiregulin), damage inflicted upon alveolar type I epithelial cells (receptor for advanced glycation end products [RAGE]), and fibrogenesis (type III procollagen [PCIII]). Relative gene expression was calculated as a ratio of the average gene expression levels compared with the reference gene (36B4) and expressed as fold change relative to nonventilated (NV) animals. Values expressed as mean  $\pm$  SD of six animals per group. Student *t* test followed by Bonferroni correction was performed between groups with similar fixed levels of  $\Delta P_L$  and Pplat,rs. One-way ANOVA followed by Bonferroni *post hoc* test. \* Versus  $V_T$ -PEEP3; † versus  $V_T$ -PEEP5.5; § versus  $V_T$ -PEEP9.5 ( $P < 0.05$ ). PEEP = positive end-expiratory pressure; Pplat,rs = respiratory system plateau pressure;  $V_T$  = tidal volume;  $\Delta P_L$  = transpulmonary driving pressure.

and amphiregulin expressions were lower in  $\Delta P_{L_{LOW}}$  ( $V_T = 6$  ml/kg and PEEP = 3 cm H<sub>2</sub>O) compared with  $\Delta P_{L_{MEAN}}$  ( $V_T = 6$  ml/kg and PEEP = 9.5 cm H<sub>2</sub>O).  $\Delta P_{L_{HIGH}}$  ( $V_T = 6$  ml/kg and PEEP = 11 cm H<sub>2</sub>O) was associated with less RAGE expression than in all other groups ventilated with  $V_T = 6$  ml/kg, except  $\Delta P_{L_{LOW}}$ . At  $\Delta P_{L_{MEAN}}$ , IL-6, amphiregulin, and PCIII expressions were higher with  $V_T = 6$  ml/kg and PEEP = 9.5 cm H<sub>2</sub>O than with  $V_T = 13$  ml/kg and PEEP = 3 cm H<sub>2</sub>O. At  $\Delta P_{L_{HIGH}}$ , different combinations of  $V_T$  and PEEP did not affect these biological markers. At Pplat,rs = 14 cm H<sub>2</sub>O, IL-6 expression was higher with  $V_T = 6$  ml/kg and PEEP = 5.5 cm H<sub>2</sub>O than with  $V_T = 13$  ml/kg and PEEP = 3 cm H<sub>2</sub>O. At Pplat,rs = 17 cm H<sub>2</sub>O, RAGE expression was higher with  $V_T = 6$  ml/kg and PEEP = 7.5 cm H<sub>2</sub>O than with  $V_T = 22$  ml/kg and PEEP = 3 cm H<sub>2</sub>O. IL-6, RAGE, and amphiregulin expressions were higher with  $V_T = 6$  ml/kg and PEEP = 9.5 than with  $V_T = 6$  ml/kg and PEEP = 3 cm

H<sub>2</sub>O. Ventilation with  $V_T = 6$  ml/kg and PEEP = 11 cm H<sub>2</sub>O reduced the expression of RAGE compared with  $V_T = 6$  ml/kg and PEEP = 9.5 cm H<sub>2</sub>O although amphiregulin expression remained high.

Correlation analyses of mechanical, biological, and morphological data among all groups are shown in table 4, Supplemental Digital Content 2, <http://links.lww.com/ALN/B150>.  $\Delta P_L$  correlated with alveolar hyperinflation and alveolar collapse. Pplat,rs correlated positively with IL-6 and amphiregulin expressions and alveolar hyperinflation and negatively with alveolar collapse. PEEP correlated positively with IL-6, amphiregulin, and PCIII expressions and alveolar hyperinflation and negatively with alveolar collapse.  $V_T$  did not present significant correlations with IL-6, RAGE, amphiregulin, or PCIII expressions, alveolar hyperinflation, or alveolar collapse (see table 4, Supplemental Digital Content 2, <http://links.lww.com/ALN/B150>). At  $V_T = 6$  ml/kg,  $\Delta P_L$  and Pplat,rs correlated positively

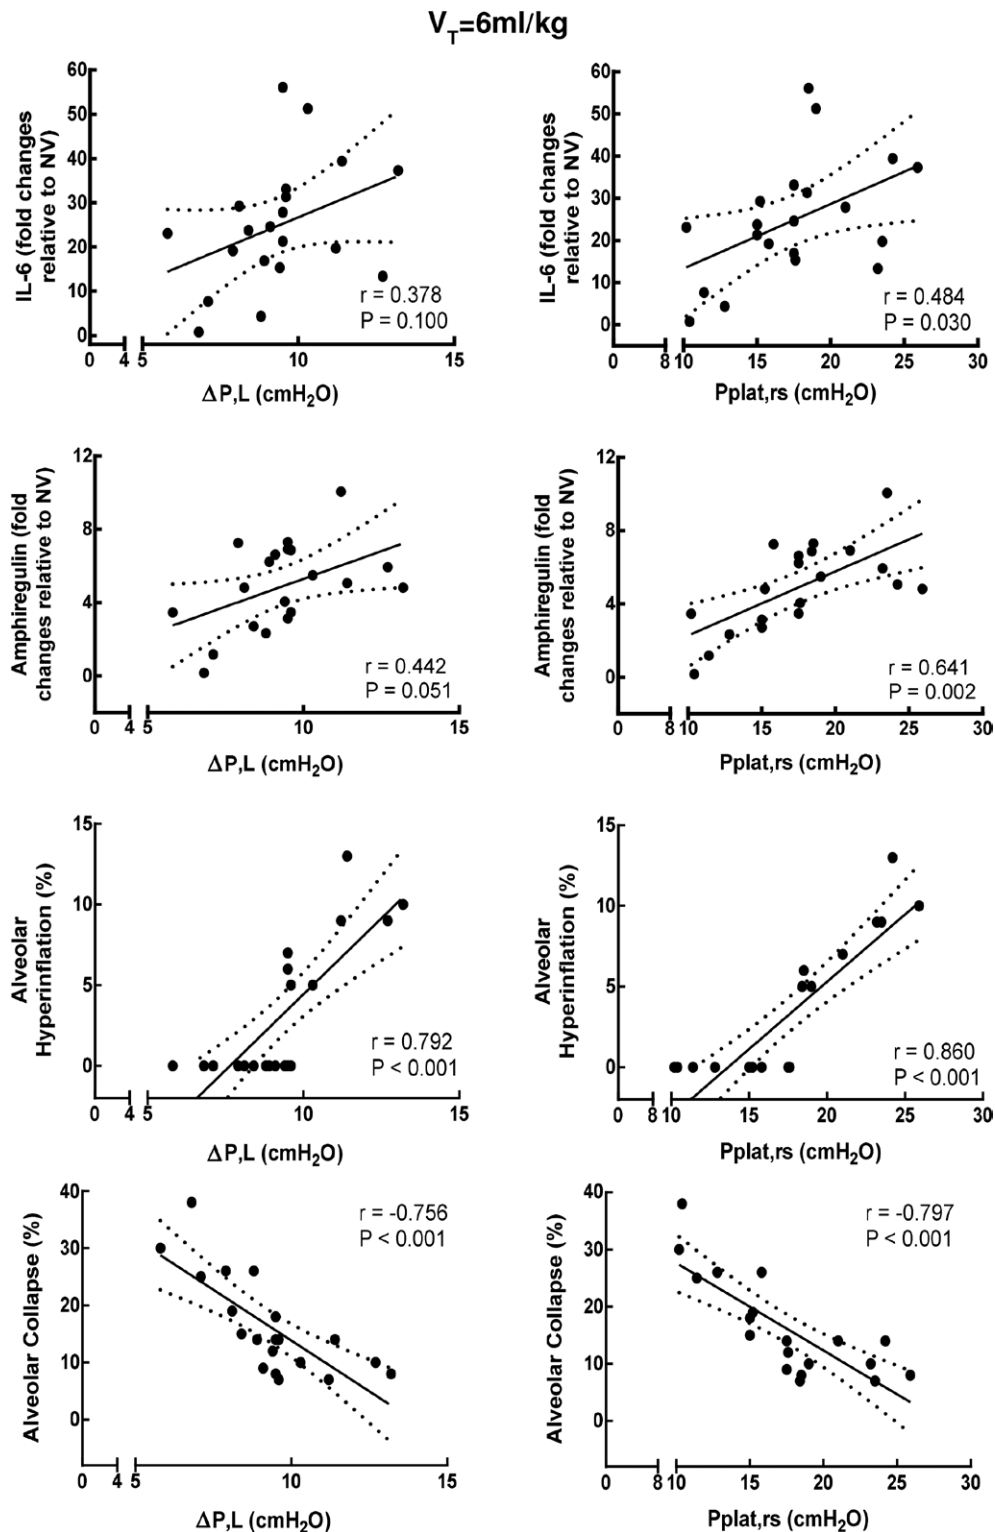

**Fig. 4.** Pearson correlations of transpulmonary driving pressure ( $\Delta P,L$ ) and respiratory system plateau pressure ( $P_{plat,rs}$ ) with interleukin (IL)-6 and amphiregulin expressions and alveolar collapse and hyperinflation at fixed tidal volume ( $V_T$ ) = 6 ml/kg. The  $r$  value represents the correlation coefficient, and  $P$ , the respective  $P$  value. Statistical significance was accepted at  $P < 0.05$ . NV = nonventilated group.

with IL-6 and amphiregulin expressions, as well as with alveolar hyperinflation, and negatively with alveolar collapse (fig. 4).

The following variables were found to be predictors of IL-6, amphiregulin, and PCIII expressions, respectively: (1)  $V_T$  (coefficient = 2.646,  $P = 0.005$ ) and PEEP

(coefficient = 8.977,  $P = 0.002$ ); (2)  $V_T$  (coefficient = 0.393,  $P = 0.005$ ); and (3)  $V_T$  (coefficient = 0.0975,  $P = 0.015$ ) and PEEP (coefficient = 0.496,  $P < 0.001$ ).

## Discussion

In the model of ARDS used in this study, we found that (1)  $\Delta P_{L,LOW}$  led to alveolar collapse, preventing cyclic recruitment/derecruitment of distal lung units, and to no hyperinflation, thus resulting in no end-inspiratory stress and lung inflammation; (2) at fixed  $\Delta P_{L,MEAN}$ , low  $V_T$  combined with a PEEP level not enough to keep lungs fully open at end-expiration reduced alveolar collapse but increased hyperinflation, consequently increasing lung inflammation and fibrogenesis, probably due to alveolar instability; (3) at fixed  $\Delta P_{L,HIGH}$ , low  $V_T$  with higher PEEP led to alveolar hyperinflation as measured by amphiregulin expression. However, no further lung inflammation and fibrogenesis possibly associated with reduced cyclic recruitment/derecruitment of distal lung units were detected. The latter findings contradict our previous third hypothesis. After multiple linear regression analyses,  $V_T$  was an independent predictor of biological markers of inflammation, lung cell stretch, and fibrogenesis. PEEP was associated with IL-6 and PCIII expression.  $\Delta P_L$  and  $P_{plat,rs}$  seem to have similar effects on the evolution of injury and inflammation in this ARDS model.

Different mechanical factors may promote VILI, such as  $V_T$ , PEEP,  $P_{plat,rs}$ , and  $\Delta P_L$ . Previous studies found these variables to interact, precluding dissociation of their individual contributions to VILI.<sup>8,12–16</sup> In the ARDS model used herein, endotoxin was intratracheally instilled<sup>6,17</sup> as a first hit to induce lung inflammation. After 24 h, animals exhibited impaired lung mechanics, atelectasis, damage to epithelium and alveolar-capillary membrane, interstitial edema, and increased IL-6 expression.<sup>5</sup> Animals were then randomized to receive different MV parameters as a second hit.<sup>18,19</sup> After ventilatory strategies, VILI was defined as histological and mechanical alterations present plus an increase in at least one of the following mediators: IL-6, amphiregulin, RAGE, and PCIII.

To the best of our knowledge, this is the first study describing the individual contributions of  $V_T$  and PEEP at each level of  $\Delta P_L$  and  $P_{plat,rs}$  on lung morphology and molecular biology in experimental ARDS. Furthermore, unlike in previous studies, the effects of ventilator strategies settings were investigated 24 h after the insult (when the morphofunctional and biological changes of ARDS were already present), and an esophageal catheter was used to measure the driving pressure of the lung.

Airway pressure is influenced by chest wall properties and respiratory muscle activity, whereas the transpulmonary pressure at end-inspiration and end-expiration ( $\Delta P_L$ ) enables estimation of the actual distending pressure of lungs, unencumbered by chest wall and patient effort on recorded airway pressures.<sup>9</sup> The driving pressure is a function not only of  $V_T$  but also of PEEP. In fact, different levels of PEEP are associated with possible changes in lung compliance. For this

reason, a given driving pressure can be achieved at higher  $V_T$  with lower PEEP as well as at lower  $V_T$  with higher PEEP. Those conditions have been addressed in the current study.

We measured mRNA expression of IL-6 as a surrogate of inflammation during VILI.<sup>20</sup> PCIII expression was evaluated because it is a marker of lung fibrogenesis,<sup>21</sup> and RAGE expression reflects alveolar type I cell injury.<sup>22</sup> Amphiregulin expression is positively modulated by hyperinflation, activates chemokines, cytokines, and adhesion molecules,<sup>23–25</sup> and represents a novel candidate gene in VILI.<sup>24,26</sup>

Our data suggest that the increase in  $\Delta P_L$  induced by higher PEEP or  $V_T$  promotes VILI. The finding that  $\Delta P_{L,LOW}$  ( $V_T = 6$  ml/kg, PEEP = 3 cm H<sub>2</sub>O) reduced VILI when compared with  $\Delta P_{L,HIGH}$  ( $V_T = 6$  ml/kg, PEEP = 11 cm H<sub>2</sub>O) may be explained by the maintenance of areas of alveolar collapse (avoiding cyclic recruitment–derecruitment) without hyperinflation, thus minimizing lung inflammation, type I epithelial cell damage, and pulmonary mechanical stress. This is consistent with the concept of “lung rest” or “permissive atelectasis” for lung protection, which has been shown in animals<sup>4,27,28</sup> and humans<sup>29</sup> to reduce alveolar damage in aerated and atelectatic lung regions. It is worth noting that  $\Delta P_{L,MEAN}$  with  $V_T = 6$  ml/kg and PEEP = 9.5 cm H<sub>2</sub>O was associated with the highest increase in markers of inflammation, epithelial cell damage, lung cell stretch, and fibrogenesis. We hypothesize that if PEEP is not high enough to keep the lungs open at end-expiration, alveolar instability may occur, with cyclic recruitment and derecruitment of lung units and increased shear stress in the unstable zone. At  $V_T = 6$  ml/kg and PEEP = 11 cm H<sub>2</sub>O, alveolar collapse and markers of epithelial cell damage were reduced, suggesting decreased strain and regional dynamic stress. By using low  $V_T$  but high PEEP, the lungs are kept tonically inflated above their functional residual capacity and thus exposed to an additional static strain.<sup>16</sup>  $Paco_2$  also increased, probably due to the associated increase in dead space.

The increased  $\Delta P_L$  resulting from different PEEP levels at fixed  $V_T = 6$  ml/kg yielded less alveolar collapse but higher  $Est,rs$ . The lack of correlation between alveolar recruitment and changes in  $Est,rs$  has been previously reported<sup>29,30</sup> and might be attributed to the prevalence of hyperinflation instead of alveolar reopening with higher PEEP. Our data indicate that during ventilation with  $V_T = 6$  ml/kg, the level of PEEP titrated according to the lowest  $\Delta P_L$  and, consequently, the best elastance, may be associated with less activation of biological markers and hyperinflation, as previously shown in experimental and human studies.<sup>3,31,32</sup>

The increase in  $\Delta P_L$  induced by changes in  $V_T$  (from 6 to 22 ml/kg) at fixed low PEEP (3 cm H<sub>2</sub>O) yielded increased alveolar collapse and hyperinflation. However, the increase in  $\Delta P_L$  obtained by using higher  $V_T$  rather than higher PEEP led to increased IL-6 expression, but no change in amphiregulin, suggesting that the cellular response to inflammation was more pronounced than stretch in the presence of greater strain and dynamic stress.



At fixed  $\Delta P_{L, \text{MEAN}}$ , but not at  $\Delta P_{L, \text{HIGH}}$ , low  $V_T$  and high PEEP compared with high  $V_T$  and low PEEP resulted in increased IL-6, amphiregulin, and PCIII expressions. We hypothesize that there could be a threshold of  $\Delta P_L$  above which differences in biomarkers of cellular activation are no longer observed by different combinations of  $V_T$  and PEEP.

Injured lungs have markedly different sizes and variable Pplat,rs. Therefore, the use of high  $V_T$  may result in greater lung damage compared with low  $V_T$ .<sup>33</sup> In our study, we observed that, compared with high  $V_T$  with low PEEP, low  $V_T$  with high PEEP increased IL-6 expression at fixed Pplat,rs = 14 cm H<sub>2</sub>O and RAGE expression at Pplat,rs = 17 cm H<sub>2</sub>O. The mechanotransduction response to Pplat,rs seems to differ from that induced by  $\Delta P_L$ . This may be due to the different limits of end-inspiratory and end-expiratory stress/strain for each combination of  $V_T$  and PEEP. In short, the relative contributions of dynamic and static stress/strain to VILI depend on Pplat,rs.

Multiple linear regressions showed that all ventilator settings investigated herein led to increased biological markers of inflammation, type I alveolar epithelial cell damage, cell stretch, and fibrogenesis. Taken together, these observations suggest that the best approach for protective MV may be to reduce  $V_T$ , PEEP,  $\Delta P_L$ , and Pplat,rs. Statistically, the most important ventilator variable associated with VILI was  $V_T$ , which is in line with experimental<sup>27</sup> and human studies<sup>33,34</sup> in ARDS.

### Possible Clinical Implications

Our data suggest that ventilation with  $V_T = 6$  ml/kg combined with the lowest PEEP and  $\Delta P_L$  to keep oxygenation within a safe range can minimize VILI. Doing so is in accordance with the hypothesis that these ventilator settings may protect the collapsed distal lung units from excessive strain, while avoiding overstretching and inflammation in normal lung regions. This strategy is also known as “permissive atelectasis.” However, if life-threatening hypoxemia with low protective  $V_T$  occurs, a defensible compromise would be to set the least PEEP needed to achieve and sustain alveolar recruitment.

In a lung exposed to a first hit (endotoxin), 1 h of MV is enough to modulate different genes associated with VILI depending on the ventilatory strategy (second hit). This is contrary to the behavior observed in healthy lungs subjected to different ventilatory strategies. Therefore, preexisting lung alterations (edema, atelectasis, or pneumonia) make the diseased lung much more susceptible to mechanical injury.<sup>19</sup>

### Limitations

First, ARDS was induced by intratracheal administration of endotoxin, and our results can be extended neither to other ARDS models with different degrees of severity nor to human ARDS. Second, the PEEP levels used in the current study, while often used in rats, may not be directly extrapolated to the clinical setting; nevertheless, theoretical analyses

have shown that PEEP levels in rats could be equivalent to double those in humans, according to the estimated transpulmonary pressure.<sup>35</sup> Therefore, the range of PEEP levels used in the current study resembles that used in mechanically ventilated critical care patients (6 to 22 cm H<sub>2</sub>O). Third, we decided to forgo recruitment maneuvers, to avoid possible confounding effects concerning different biological impacts on lung tissue,<sup>6,36,37</sup> but cannot rule out that such maneuvers might have further improved lung function and affected different biomarkers.<sup>38</sup> However, the highest PEEP levels used in the current study were able to keep alveolar units open, as demonstrated both by morphometric data and by biological markers. This study was based on a proof of concept, not on the best ventilatory strategy. Fourth, mediators were measured in lung tissue, but not in blood. Fifth, acidosis may modulate the inflammatory process,<sup>39</sup> but its potential effects were not evaluated. Sixth, the high level of variability in physiological data within each group may account for the lack of between-group differences at similar driving or plateau pressures. Finally, the observation time was relatively short as compared with previous studies (1 vs. 2 to 6 h), precluding changes in protein levels of all biological markers analyzed. Furthermore, to keep animals with endotoxin-induced ARDS alive for 4 to 6 h, greater amounts of fluid and/or inotropes would be required, which could interfere with gene expression.<sup>40</sup>

### Conclusions

In experimental endotoxin-induced ARDS, a ventilation strategy combining low  $V_T$  (6 ml/kg) and low PEEP that resulted in low  $\Delta P_L$  and Pplat,rs mitigated VILI, despite allowing alveolar collapse. Furthermore,  $V_T = 6$  ml/kg combined with PEEP at the highest level to open the lungs reduced inflammation and epithelial cell damage, despite allowing hyperinflation. In short,  $V_T = 6$  ml/kg with PEEP levels not high enough to keep lungs open can cause alveolar instability with subsequent VILI.

### Acknowledgments

The authors thank Andre Silva, B.Sc. (Laboratory of Pulmonary Investigation, Carlos Chagas Filho Biophysics Institute, Federal University of Rio de Janeiro, Rio de Janeiro, Brazil), for animal care; Ana Lucia Silva, B.Sc. (Laboratory of Pulmonary Investigation, Carlos Chagas Filho Biophysics Institute, Federal University of Rio de Janeiro), for her help with microscopy; Moira Schottler (Rio de Janeiro, Brazil) and Filipe Vasconcellos (Porto Alegre, Rio Grande do Sul, Brazil) for their assistance in editing the manuscript; Ronir Luiz, Ph.D. (Institute of Public Health Studies, Federal University of Rio de Janeiro), for his help with statistics, and MAQUET (São Paulo, Brazil) for technical support.

Support was provided by the Brazilian Council for Scientific and Technological Development (CNPq, Brasília, Distrito Federal, Brazil), Rio de Janeiro a Research Foundation (FAPERJ, Rio de Janeiro, Brazil), São Paulo State Research Foundation (FAPESP, São Paulo, São Paulo, Brazil), National Institute of Science and Technology of Drugs and Medicine

(INCT-INOVAR, Brasília, Distrito Federal, Brazil), and Coordination for the Improvement of Higher Education Personnel (CAPES, Brasília, Distrito Federal, Brazil).

## Competing Interests

The authors declare no competing interests.

## Correspondence

Address correspondence to Dr. Rocco: Laboratory of Pulmonary Investigation, Carlos Chagas Filho Biophysics Institute, Federal University of Rio de Janeiro, Rio de Janeiro, Brazil. [prmrocco@gmail.com](mailto:prmrocco@gmail.com). Information on purchasing reprints may be found at [www.anesthesiology.org](http://www.anesthesiology.org) or on the masthead page at the beginning of this issue. ANESTHESIOLOGY's articles are made freely accessible to all readers, for personal use only, 6 months from the cover date of the issue.

## References

- Chiumello D, Froio S, Bouhemad B, Camporota L, Coppola S: Clinical review: Lung imaging in acute respiratory distress syndrome patients—An update. *Crit Care* 2013; 17:243
- Amato MB, Barbas CS, Medeiros DM, Magaldi RB, Schettino GP, Lorenzi-Filho G, Kairalla RA, Deheinzelin D, Munoz C, Oliveira R, Takagaki TY, Carvalho CR: Effect of a protective-ventilation strategy on mortality in the acute respiratory distress syndrome. *N Engl J Med* 1998; 338:347–54
- Spieth PM, Güldner A, Carvalho AR, Kasper M, Pelosi P, Uhlig S, Koch T, Gama de Abreu M: Open lung approach *vs* acute respiratory distress syndrome network ventilation in experimental acute lung injury. *Br J Anaesth* 2011; 107:388–97
- Tsuchida S, Engelberts D, Peltekova V, Hopkins N, Frndova H, Babyn P, McKerlie C, Post M, McLoughlin P, Kavanagh BP: Atelectasis causes alveolar injury in nonatelectatic lung regions. *Am J Respir Crit Care Med* 2006; 174:279–89
- Matute-Bello G, Downey G, Moore BB, Groshong SD, Matthay MA, Slutsky AS, Kuebler WM: Acute Lung Injury in Animals Study Group: An official American Thoracic Society workshop report: Features and measurements of experimental acute lung injury in animals. *Am J Respir Cell Mol Biol* 2011; 44:725–38
- Riva DR, Oliveira MB, Rzezinski AF, Rangel G, Capelozzi VL, Zin WA, Morales MM, Pelosi P, Rocco PR: Recruitment maneuver in pulmonary and extrapulmonary experimental acute lung injury. *Crit Care Med* 2008; 36:1900–8
- Baydur A, Behrakis PK, Zin WA, Jaeger M, Milic-Emili J: A simple method for assessing the validity of the esophageal balloon technique. *Am Rev Respir Dis* 1982; 126:788–91
- Pássaro CP, Silva PL, Rzezinski AF, Abrantes S, Santiago VR, Nardelli L, Santos RS, Barbosa CM, Morales MM, Zin WA, Amato MB, Capelozzi VL, Pelosi P, Rocco PR: Pulmonary lesion induced by low and high positive end-expiratory pressure levels during protective ventilation in experimental acute lung injury. *Crit Care Med* 2009; 37:1011–7
- Richard JC, Marini JJ: Transpulmonary pressure as a surrogate of plateau pressure for lung protective strategy: Not perfect but more physiologic. *Intensive Care Med* 2012; 38:339–41
- Cruz-Orive LM, Weibel ER: Recent stereological methods for cell biology: A brief survey. *Am J Physiol* 1990; 258(4 Pt 1):L148–56
- Akamine R, Yamamoto T, Watanabe M, Yamazaki N, Kataoka M, Ishikawa M, Ooie T, Baba Y, Shinohara Y: Usefulness of the 5' region of the cDNA encoding acidic ribosomal phosphoprotein P0 conserved among rats, mice, and humans as a standard probe for gene expression analysis in different tissues and animal species. *J Biochem Biophys Methods* 2007; 70:481–6
- Ricard JD, Dreyfuss D, Saumon G: Production of inflammatory cytokines in ventilator-induced lung injury: A reappraisal. *Am J Respir Crit Care Med* 2001; 163:1176–80
- Muscledere JG, Mullen JB, Gan K, Slutsky AS: Tidal ventilation at low airway pressures can augment lung injury. *Am J Respir Crit Care Med* 1994; 149:1327–34
- Chiumello D, Pristine G, Slutsky AS: Mechanical ventilation affects local and systemic cytokines in an animal model of acute respiratory distress syndrome. *Am J Respir Crit Care Med* 1999; 160:109–16
- Monkman SL, Andersen CC, Nahmias C, Ghaffar H, Bourgeois JM, Roberts RS, Schmidt B, Kirpalani HM: Positive end-expiratory pressure above lower inflection point minimizes influx of activated neutrophils into lung. *Crit Care Med* 2004; 32:2471–5
- Protti A, Andreis DT, Monti M, Santini A, Sparacino CC, Langer T, Votta E, Gatti S, Lombardi L, Leopardi O, Masson S, Cressoni M, Gattinoni L: Lung stress and strain during mechanical ventilation: Any difference between statics and dynamics? *Crit Care Med* 2013; 41:1046–55
- Santos CL, Moraes L, Santos RS, dos Santos Samary C, Silva JD, Morales MM, Capelozzi VL, de Abreu MG, Schanaider A, Silva PL, Garcia CS, Pelosi P, Rocco PR: The biological effects of higher and lower positive end-expiratory pressure in pulmonary and extrapulmonary acute lung injury with intra-abdominal hypertension. *Crit Care* 2014; 18:R121
- Wrigge H, Uhlig U, Zinserling J, Behrends-Callsen E, Ottersbach G, Fischer M, Uhlig S, Putensen C: The effects of different ventilatory settings on pulmonary and systemic inflammatory responses during major surgery. *Anesth Analg* 2004; 98:775–81
- Dreyfuss D, Saumon G: Ventilator-induced lung injury: Lessons from experimental studies. *Am J Respir Crit Care Med* 1998; 157:294–323
- Ko YA, Yang MC, Huang HT, Hsu CM, Chen LW: NF- $\kappa$ B activation in myeloid cells mediates ventilator-induced lung injury. *Respir Res* 2013; 14:69
- Chesnutt AN, Matthay MA, Tibayan FA, Clark JG: Early detection of type III procollagen peptide in acute lung injury. Pathogenetic and prognostic significance. *Am J Respir Crit Care Med* 1997; 156(3 Pt 1):840–5
- Yamakawa N, Uchida T, Matthay MA, Makita K: Proteolytic release of the receptor for advanced glycation end products from *in vitro* and *in situ* alveolar epithelial cells. *Am J Physiol Lung Cell Mol Physiol* 2011; 300:L516–25
- Uhlig U, Haitsma JJ, Goldmann T, Poelma DL, Lachmann B, Uhlig S: Ventilation-induced activation of the mitogen-activated protein kinase pathway. *Eur Respir J* 2002; 20:946–56
- Dolinay T, Wu W, Kaminski N, Ifedigbo E, Kaynar AM, Szilasi M, Watkins SC, Ryter SW, Hoetzel A, Choi AM: Mitogen-activated protein kinases regulate susceptibility to ventilator-induced lung injury. *PLoS One* 2008; 3:e1601
- Uhlig S, Ranieri M, Slutsky AS: Biotrauma hypothesis of ventilator-induced lung injury. *Am J Respir Crit Care Med* 2004; 169:314–5; author reply 315
- Dolinay T, Kaminski N, Felgendreher M, Kim HP, Reynolds P, Watkins SC, Karp D, Uhlig S, Choi AM: Gene expression profiling of target genes in ventilator-induced lung injury. *Physiol Genomics* 2006; 26:68–75
- Wakabayashi K, Wilson MR, Tatham KC, O'Dea KP, Takata M: Volutrauma, but not atelectrauma, induces systemic cytokine production by lung-margined monocytes. *Crit Care Med* 2014; 42:e49–57
- Borges JB, Costa EL, Suarez-Sipmann F, Widström C, Larsson A, Amato M, Hedenstierna G: Early inflammation mainly affects normally and poorly aerated lung in experimental ventilator-induced lung injury\*. *Crit Care Med* 2014; 42:e279–87
- Ranieri VM, Eissa NT, Corbeil C, Chassé M, Braidy J, Matar N, Milic-Emili J: Effects of positive end-expiratory pressure on alveolar recruitment and gas exchange in patients with the

- adult respiratory distress syndrome. *Am Rev Respir Dis* 1991; 144(3 Pt 1):544–51
30. Servillo G, Svantesson C, Beydon L, Roupie E, Brochard L, Lemaire F, Jonson B: Pressure-volume curves in acute respiratory failure: Automated low flow inflation *versus* occlusion. *Am J Respir Crit Care Med* 1997; 155:1629–36
  31. Briel M, Meade M, Mercat A, Brower RG, Talmor D, Walter SD, Slutsky AS, Pullenayegum E, Zhou Q, Cook D, Brochard L, Richard JC, Lamontagne F, Bhatnagar N, Stewart TE, Guyatt G: Higher *vs* lower positive end-expiratory pressure in patients with acute lung injury and acute respiratory distress syndrome: Systematic review and meta-analysis. *JAMA* 2010; 303:865–73
  32. Brower RG, Lanken PN, MacIntyre N, Matthay MA, Morris A, Ancukiewicz M, Schoenfeld D, Thompson BT; National Heart, Lung, and Blood Institute ARDS Clinical Trials Network: Higher *versus* lower positive end-expiratory pressures in patients with the acute respiratory distress syndrome. *N Engl J Med* 2004; 351:327–36
  33. Brochard L, Roudot-Thoraval F, Roupie E, Delclaux C, Chastre J, Fernandez-Mondéjar E, Clémenti E, Mancebo J, Factor P, Matamis D, Ranieri M, Blanch L, Rodi G, Mentec H, Dreyfuss D, Ferrer M, Brun-Buisson C, Tobin M, Lemaire F: Tidal volume reduction for prevention of ventilator-induced lung injury in acute respiratory distress syndrome. The Multicenter Trial Group on Tidal Volume reduction in ARDS. *Am J Respir Crit Care Med* 1998; 158:1831–8
  34. Ventilation with lower tidal volumes as compared with traditional tidal volumes for acute lung injury and the acute respiratory distress syndrome. The Acute Respiratory Distress Syndrome Network. *N Engl J Med* 2000; 342:1301–8
  35. Thammanomai A, Hamakawa H, Bartolák-Suki E, Suki B: Combined effects of ventilation mode and positive end-expiratory pressure on mechanics, gas exchange and the epithelium in mice with acute lung injury. *PLoS One* 2013; 8:e53934
  36. Silva PL, Cruz FF, Fujisaki LC, Oliveira GP, Samary CS, Ornellas DS, Maron-Gutierrez T, Rocha NN, Goldenberg R, Garcia CS, Morales MM, Capelozzi VL, Gama de Abreu M, Pelosi P, Rocco PR: Hypervolemia induces and potentiates lung damage after recruitment maneuver in a model of sepsis-induced acute lung injury. *Crit Care* 2010; 14:R114
  37. Farias LL, Faffe DS, Xisto DG, Santana MC, Lassance R, Prota LF, Amato MB, Morales MM, Zin WA, Rocco PR: Positive end-expiratory pressure prevents lung mechanical stress caused by recruitment/derecruitment. *J Appl Physiol* (1985) 2005; 98:53–61
  38. Reiss LK, Kowalik A, Uhlig S: Recurrent recruitment manoeuvres improve lung mechanics and minimize lung injury during mechanical ventilation of healthy mice. *PLoS One* 2011; 6:e24527
  39. Laffey JG, O’Croinin D, McLoughlin P, Kavanagh BP: Permissive hypercapnia—Role in protective lung ventilatory strategies. *Intensive Care Med* 2004; 30:347–56
  40. Moriondo A, Marcozzi C, Bianchin F, Reguzzoni M, Severgnini P, Protasoni M, Raspanti M, Passi A, Pelosi P, Negrini D: Impact of mechanical ventilation and fluid load on pulmonary glycosaminoglycans. *Respir Physiol Neurobiol* 2012; 181:308–20
